# Supplementary material for: Automated Composition Analysis of Thrombus from Endovascular Treatment in Acute Ischemic Stroke Using Computer Vision
Source: PubMed Central journal article supplement — J Stroke. 2022 Sep 30;24(3):433–5. doi: 10.5853/jos.2022.02054 (PMC9561224; doi:10.5853/jos.2022.02054), 2022-09-30
Supplement: jos-2022-02054-suppl2.pdf [file jos-2022-02054-suppl2.pdf]

**Supplementary Table 1.** Characteristics of the patients included in the study

| Variable              | Patients (n=10)  |
|-----------------------|------------------|
| Age (yr)              | 71.5 (66.2–79.8) |
| Male sex              | 6 (60.0)         |
| Hypertension          | 7 (70.0)         |
| Diabetes              | 2 (20.0)         |
| Dyslipidemia          | 2 (20.0)         |
| TOAST classification  |                  |
| CE                    | 6 (60.0)         |
| LAA                   | 1 (10.0)         |
| UT                    | 3 (30.0)         |
| Occlusion site        |                  |
| ICA                   | 4 (40.0)         |
| MCA                   | 6 (60.0)         |
| Composition ratio (%) |                  |
| RBC                   | 47.4 (31.4–54.4) |
| Platelet              | 16.9 (14.2–21.0) |
| Fibrinogen            | 31.8 (27.8–41.5) |
| Tissue factor         | 30.7 (26.3–39.8) |

Values are presented as median (interquartile range) or number (%). TOAST, Trial of Org 10172 in Acute Stroke Treatment; CE, cardioembolic; LAA, large artery atherosclerotic; UT, more than two causes; ICA, internal carotid artery; MCA, middle cerebral artery; RBC, red blood cell.

**Supplementary Table 2.** Time needed for analysis using ARIA and traditional methodology for each analyst

| Analyst      | ARIA             | Traditional method  | P      |
|--------------|------------------|---------------------|--------|
| Professional |                  |                     |        |
| Focused time | 7.0 (5.0–10.0)   | 244.0 (209.5–278.0) | <0.001 |
| Total time   | 24.5 (19.8–34.8) | 254.0 (219.8–287.0) | <0.001 |
| Trained      |                  |                     |        |
| Focused time | 12.0 (10.0–14.2) | 134.5 (113.0–168.8) | <0.001 |
| Total time   | 35.5 (30.8–41.2) | 143.5 (120.8–169.8) | <0.001 |
| Untrained 1  |                  |                     |        |
| Focused time | 1.0 (1.0–3.0)    | 320.5 (285.0–385.5) | <0.001 |
| Total time   | 24.0 (19.8–29.0) | 326.5 (294.8–391.0) | <0.001 |
| Untrained 2  |                  |                     |        |
| Focused time | 7.0 (4.0–13.0)   | 220.5 (199.0–253.0) | <0.001 |
| Total time   | 29.5 (24.0–36.0) | 232.5 (206.2–266.2) | <0.001 |
| All analysts |                  |                     |        |
| Focused time | 7.0 (3.0–11.0)   | 231.0 (182.0–286.0) | <0.001 |
| Total time   | 29.0 (21.0–37.0) | 242.0 (183.5–296.5) | <0.001 |

Values are presented as median second (interquartile range). ARIA, Automated Region-of-interest based Image Analysis.
