# Supplementary material for: Automated Composition Analysis of Thrombus from Endovascular Treatment in Acute Ischemic Stroke Using Computer Vision
Source: PubMed Central journal article supplement — J Stroke. 2022 Sep 30;24(3):433–5. doi: 10.5853/jos.2022.02054 (PMC9561224; doi:10.5853/jos.2022.02054), 2022-09-30
Supplement: jos-2022-02054-suppl3.pdf [file jos-2022-02054-suppl3.pdf]

**Supplementary Table 3.** Comparison of results grouped by dominant component of the thrombus of each patient

| Variable                                        | RBC dominant        | PLT+Fibrin dominant |
|-------------------------------------------------|---------------------|---------------------|
| Spearman's correlation coefficient (rho)        | 0.954               | 0.767               |
| <i>P</i>                                        | <0.001              | <0.001              |
| Differences between analysts (stained ratio, %) |                     |                     |
| ARIA                                            | 0.4 (0.1–1.4)       | 0.1 (0.0–0.5)       |
| Traditional                                     | 0.7 (0.3–2.5)       | 0.4 (0.2–1.7)       |
| <i>P</i>                                        | 0.001               | <0.001              |
| Time needed for analysis (focused time, sec)    |                     |                     |
| ARIA                                            | 7.0 (3.0–11.2)      | 6.5 (2.8–11.0)      |
| Traditional                                     | 238.5 (140.2–293.2) | 229.0 (177.8–282.8) |
| <i>P</i>                                        | <0.001              | <0.001              |

Values are presented as median (interquartile range) for differences between analysts and time needed for analysis. RBC, red blood cell; PLT, platelet; ARIA, Automated Region-of-interest based Image Analysis.

**Supplementary Table 4.** Comparison of analyst results grouped by stained antibody

| Variable                                        | CD42b               | Glycophorin A       | Fibrinogen          | Tissue factor       | Tissue factor*      |
|-------------------------------------------------|---------------------|---------------------|---------------------|---------------------|---------------------|
| Spearman's correlation coefficient (rho)        | 0.888               | 0.922               | 0.767               | 0.441               | 0.820               |
| <i>P</i>                                        | <0.001              | <0.001              | <0.001              | <0.001              | <0.001              |
| Differences between analysts (stained ratio, %) |                     |                     |                     |                     |                     |
| ARIA                                            | 0.2 (0.1–0.9)       | 0.4 (0.1–0.8)       | 0.3 (0.0–1.6)       | 0.1 (0.0–0.4)       | 0.1 (0.0–0.4)       |
| Traditional                                     | 0.6 (0.3–0.7)       | 0.2 (0.0–0.7)       | 1.3 (0.6–4.3)       | 0.6 (0.1–2.2)       | 0.2 (0.1–2.2)       |
| <i>P</i>                                        | <0.001              | 0.185               | <0.001              | 0.001               | 0.011               |
| Time needed for analysis (focused time, sec)    |                     |                     |                     |                     |                     |
| ARIA                                            | 7.0 (2.8–10.0)      | 4.5 (2.0–11.0)      | 7.0 (3.8–12.2)      | 8.0 (1.8–12.0)      | 8.0 (1.8–11.2)      |
| Traditional                                     | 243.5 (183.2–283.8) | 216.0 (164.8–291.2) | 225.5 (184.5–282.8) | 243.0 (169.5–295.5) | 243.0 (165.8–295.5) |
| <i>P</i>                                        | <0.001              | <0.001              | <0.001              | <0.001              | <0.001              |

Values are presented as median (interquartile range) for differences between analysts and time needed for analysis. ARIA, Automated Region-of-interest based Image Analysis.

\*Without one sample with exceptional disagreement between methods due to differences in thresholding algorithm.
