# Supplementary material for: Automated Composition Analysis of Thrombus from Endovascular Treatment in Acute Ischemic Stroke Using Computer Vision
Source: PubMed Central journal article supplement — J Stroke. 2022 Sep 30;24(3):433–5. doi: 10.5853/jos.2022.02054 (PMC9561224; doi:10.5853/jos.2022.02054), 2022-09-30
Supplement: jos-2022-02054-suppl4.pdf [file jos-2022-02054-suppl4.pdf]

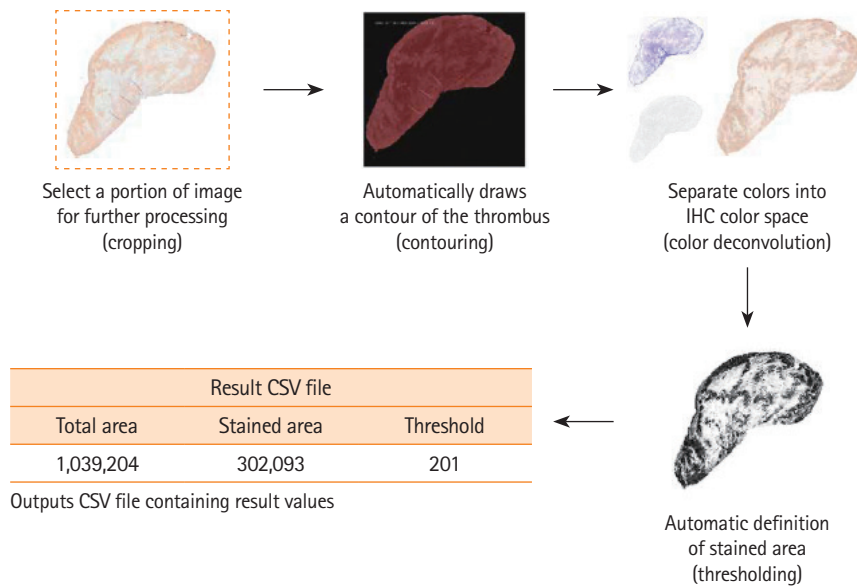

**Supplementary Figure 1.** Imaging analysis process performed by Automated Region-of-interest based Image Analysis (ARIA). IHC, immunohistochemistry; CSV, comma separated value.

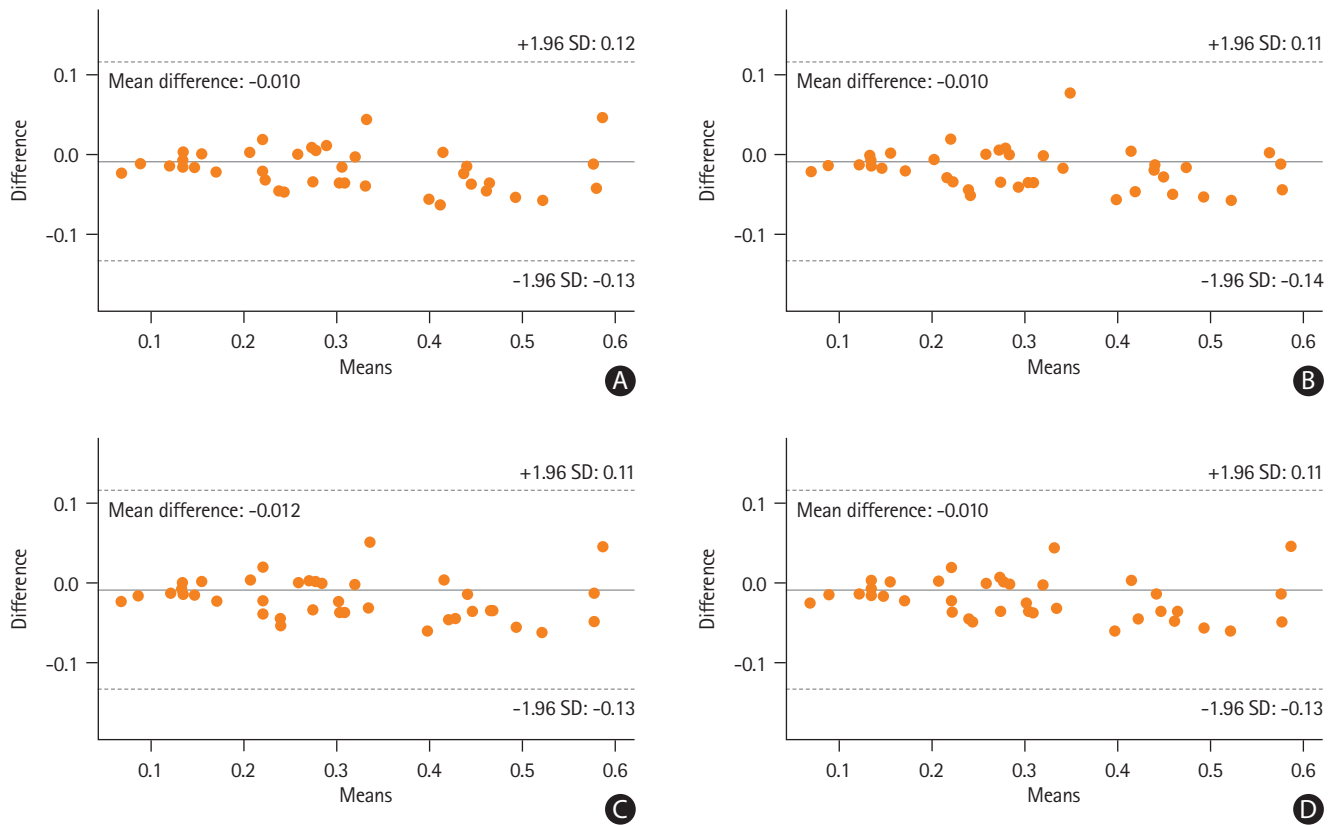

**Supplementary Figure 2.** Bland-Altman plots of stained ratio results from each analyst using Automated Region-of-interest based Image Analysis (ARIA) compared to those of the professional analyst using the traditional method: (A) the professional analyst, (B) trained analyst, (C) untrained analyst 1, and (D) untrained analyst 2. SD, standard deviation.
