# Supplementary material for: Automated Composition Analysis of Thrombus from Endovascular Treatment in Acute Ischemic Stroke Using Computer Vision
Source: PubMed Central journal article supplement — J Stroke. 2022 Sep 30;24(3):433–5. doi: 10.5853/jos.2022.02054 (PMC9561224; doi:10.5853/jos.2022.02054), 2022-09-30
Supplement: jos-2022-02054-suppl5.pdf [file jos-2022-02054-suppl5.pdf]

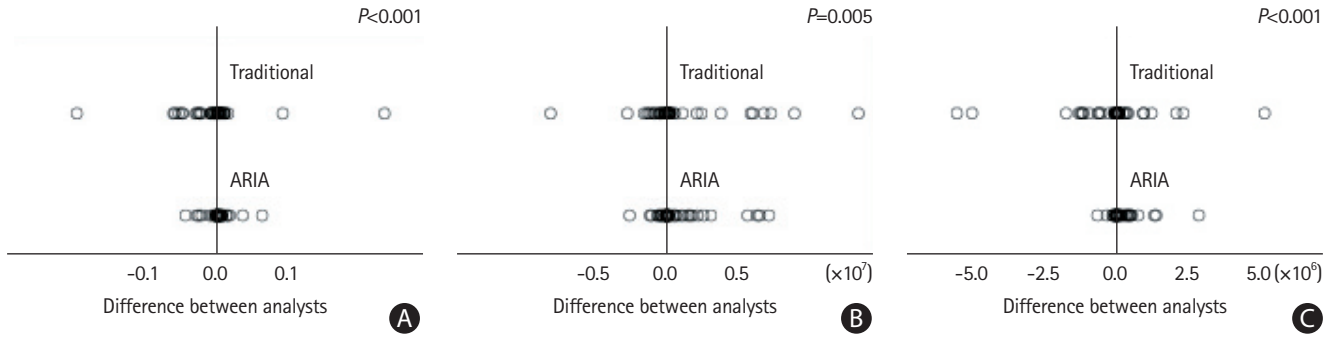

**Supplementary Figure 3.** Scatter plot showing distribution of the result differences between analysts of (A) stained ratio, (B) total thrombus area, and (C) stained area for the same slide image using Automated Region-of-interest based Image Analysis (ARIA) and traditional methodology. Differences from all possible combination of two analysts were plotted.

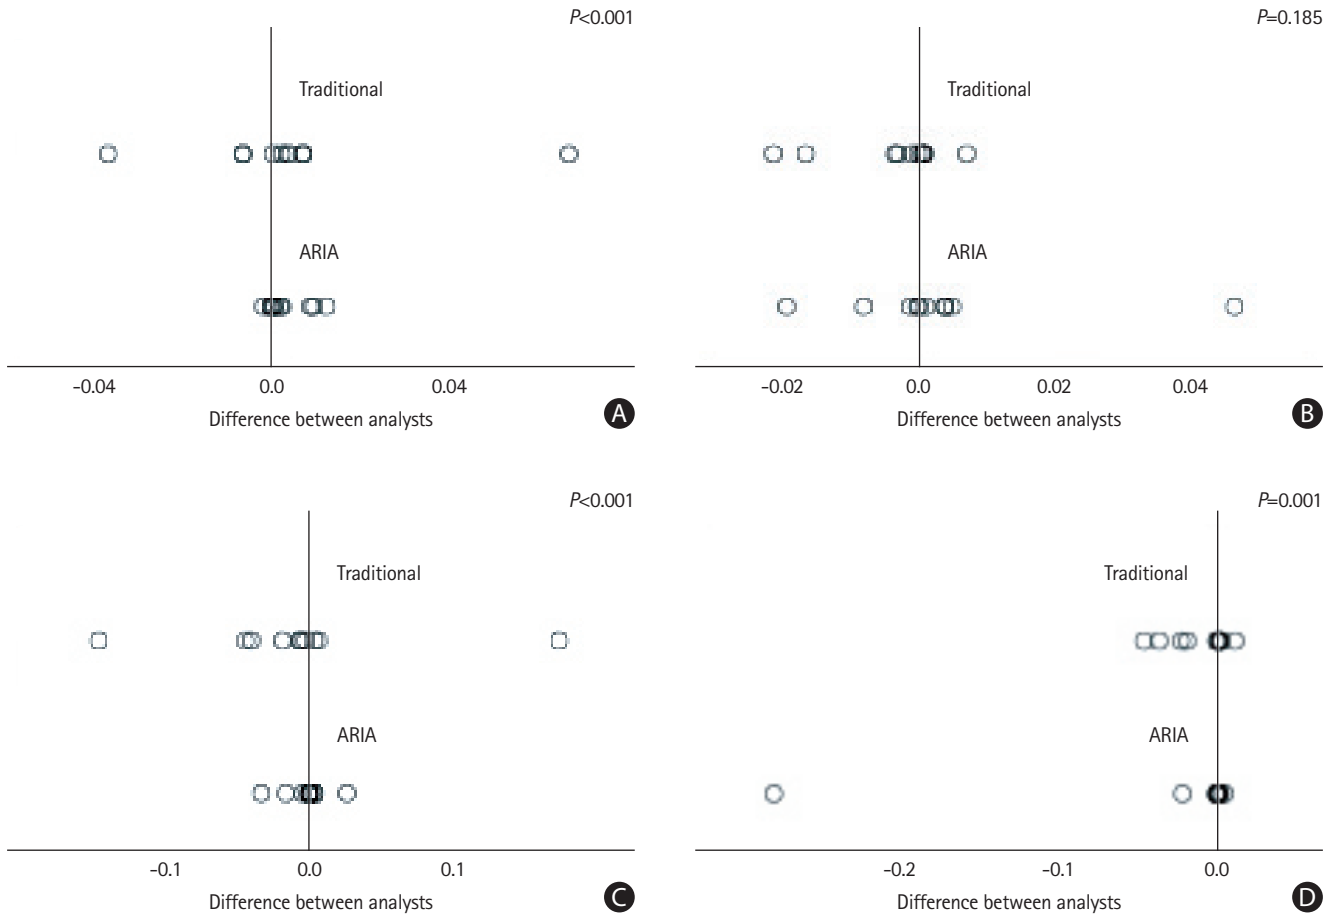

**Supplementary Figure 4.** Scatter plot showing distribution of the result differences between analysts of (A) anti-CD42b, (B) anti-glycophorin A, (C) anti-fibrinogen, and (D) anti-tissue factor-stained slides using Automated Region-of-interest based Image Analysis (ARIA) and traditional methodology. Differences from all possible combination of two analysts were plotted.
